- ganglion block for sudden profound hearing loss. *ANESTHESIOLOGY* 1981; 54:421-3
35. Haug O, Draper WL, Haug SA: Stellate ganglion blocks for idiopathic sensorineural hearing loss. *Arch Otolaryngol* 1976; 102:5-8
  36. Liu F, Xu G, Liu Z, Zhao Y, Lv X, Wang J: The effects of stellate ganglion block on visual evoked potential and blood flow of the ophthalmic and internal carotid arteries in patients with ischemic optic neuropathy. *Anesth Analg* 2005; 100:1193-6
  37. Pulec JL: Total facial nerve decompression: Technique to avoid complications. *Ear Nose Throat J* 1996; 75:410-5
  38. Hogan QH, Erickson SJ, Haddox JD, Abram SE: The spread of solutions during stellate ganglion block. *Reg Anesth* 1992; 17:78-83
  39. Hogan QH, Erickson SJ: MR imaging of the stellate ganglion: Normal appearance. *AJR Am J Roentgenol* 1992; 158:655-9
  40. Higa K, Hirata K, Hirota K, Nitahara K, Shono S: Retropharyngeal hematoma after stellate ganglion block: Analysis of 27 patients reported in the literature. *ANESTHESIOLOGY* 2006; 105:1238-45
  41. Bernstein MA, Huston J 3rd, Lin C, Gibbs GF, Felmlee JP: High-resolution intracranial and cervical MRA at 3.0T: Technical considerations and initial experience. *Magn Reson Med* 2001; 46:955-62

## ANESTHESIOLOGY REFLECTIONS

### The 20-cent Virginia Apgar Stamp

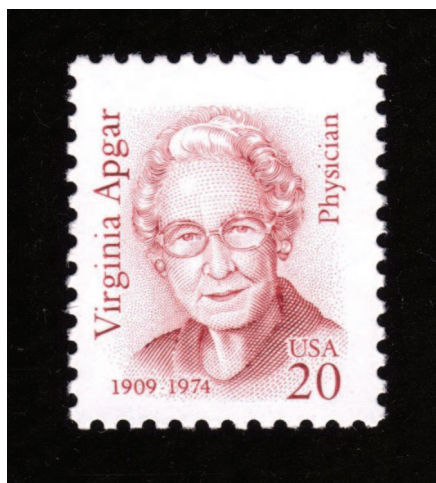

Anesthesiologist Virginia Apgar (1909–1974) presented in 1952 what the “Butterfield epigram” popularized later as the “APGAR Score” for assessing newborns’ well-being (Appearance, Pulse, Grimace, Activity, and Respiration). The American Society of Anesthesiologists’ first female officer (Treasurer, 1941–1945) and Distinguished Service Award recipient (1961), Dr. Apgar also directed a division of the March of Dimes. The insatiably curious Apgar hand-fashioned and played her own violin, mezzo violin, and cello; she even “liberated” a payphone booth’s curly maple shelf to carve a viola. Dr. Apgar also loved to fish, golf, and watch baseball. Lecturing as rapidly as she drove cars and piloted airplanes, Dr. Apgar raced through life seeking low golf, high baseball, higher musical, and, of course, the highest neonatal scores. A stamp collector herself, Virginia Apgar, M.D., M.P.H., was honored posthumously on a U.S. postage stamp in 1994 (see above). (Copyright © the American Society of Anesthesiologists, Inc. This image appears in color in the *Anesthesiology Reflections* online collection available at [www.anesthesiology.org](http://www.anesthesiology.org).)

*George S. Bause, M.D., M.P.H., Honorary Curator, ASA’s Wood Library-Museum of Anesthesiology, Park Ridge, Illinois, and Clinical Associate Professor, Case Western Reserve University, Cleveland, Ohio. UJYC@aol.com.*
